# Supplementary material
Source: MDPI journal article supplement (https://www.mdpi.com/2071-1050/14/18/11374)
Supplement: s1 [file s1]

**Supplementary Table S1. Soil physio-chemical properties and heavy metal contents****Soil Analysis**

| Parameters                         | Pre-treatment | Post-treatment |
|------------------------------------|---------------|----------------|
| pH                                 | 5.98±0.028    | 7.96±          |
| Bulk Density mg/m <sup>3</sup>     | 1.1±0.006     | 1.5±0.540      |
| Particle Density mg/m <sup>3</sup> | 2.50±0.356    | 2.71±0.566     |
| E.C (dSm <sup>-1</sup> )           | 2.06±0.013    | 2.15±0.246     |
| Organic Carbon (%)                 | 2.772±0.577   | 1.46±0.670     |
| Silicon (%)                        | 11.33±0.145   | 21.427±0.135   |
| Calcium (Ca)                       | 68±0.645      | 80±0.785       |
| Total P (Phosphorous)              | 17±0.325      | 20±0.276       |
| Total N (Nitrogen)                 | 0.80±0.312    | 1.21±0.413     |
| S (Sulphur)                        | 29±0.654      | 34±2.55        |
| Total K (Potassium) (%)            | 140±4.01      | 145±6.351      |
| Cadmium (Cd) mg/kg                 | 0.448±.0037   | 0.394±0.021    |
| Cobalt (Co) mg/kg                  | 0.537±.0265   | 0.502±0.0254   |
| Chromium (Cr) mg/kg                | 0.135±0.0145  | 0.372±0.012    |
| Copper (Cu) mg/kg                  | 1.222±0.0064  | 1.272±0.0073   |
| Lead (Pb) mg/kg                    | 0.1791±0.015  | 0.1253±0.0201  |
| Manganese (Mn) mg/kg               | 0.537±0.0062  | 0.0519±0.0251  |
| Iron (Fe) mg/kg                    | 1.868±0.7593  | 4.0279±0.8604  |
| Zinc (Zn) mg/kg                    | 4.535±0.571   | 13.679±0.0301  |

**Supplementary Table S2.** Operating conditions for the analysis of metals using flame atomic absorption spectrometry.

| Element                     | Cd    | Co    | Cr    | Cu    | Pb    | Fe    | Mn    | Zn    |
|-----------------------------|-------|-------|-------|-------|-------|-------|-------|-------|
| Wavelength (nm)             | 228.8 | 422.7 | 279.5 | 324.8 | 283.3 | 248.3 | 232   | 213.9 |
| Detection limits (mg/kg)    | 0.001 | 0.007 | 0.012 | 0.01  | 0.04  | 0.036 | 0.012 | 0.052 |
| Slit width (nm)             | 0.7   | 0.7   | 0.2   | 0.7   | 0.7   | 0.2   | 0.2   | 0.7   |
| Lamp current low (mA)       | 8     | 10    | 12    | 6     | 10    | 12    | 12    | 8     |
| Air flow rate (L/min)       | 15    | 15    | 15    | 15    | 15    | 15    | 15    | 15    |
| Acetylene flow rate (L/min) | 1.8   | 2.8   | 2.2   | 1.8   | 2     | 2.2   | 1.6   | 2     |
| Burner height (mm)          | 7     | 9     | 9     | 7     | 7     | 9     | 7     | 7     |
